# Supplementary material for: Automated task training and longitudinal monitoring of mouse mesoscale cortical circuits using home cages
Source: eLife journal article supplement (doi:10.7554/elife.55964), 2020-05-15

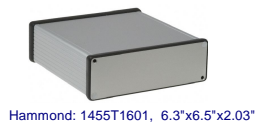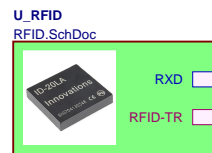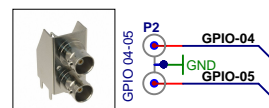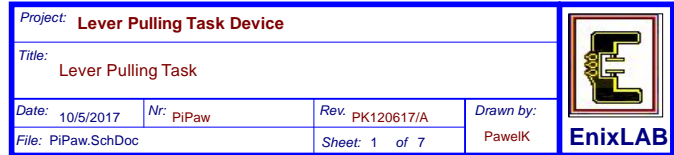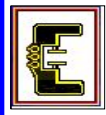

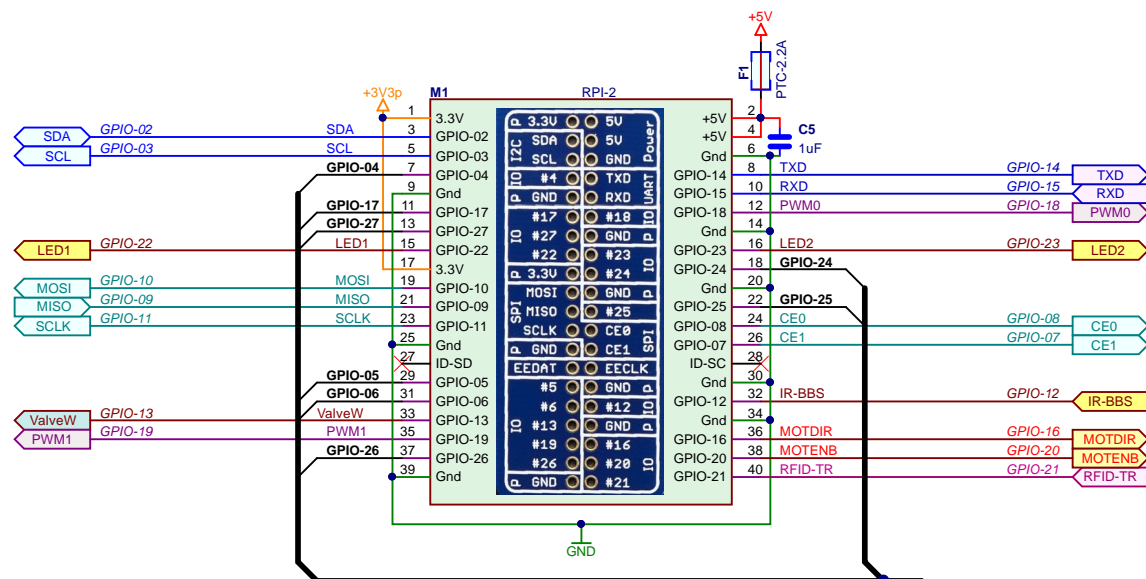

Digi Key:36-2013-ND  
Rpi is mounted on 4x1" standoff 4-40

Digi Key: SAM8767-ND  
Samtec: ESQ-120-14-G-D

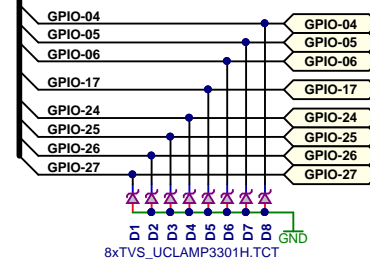



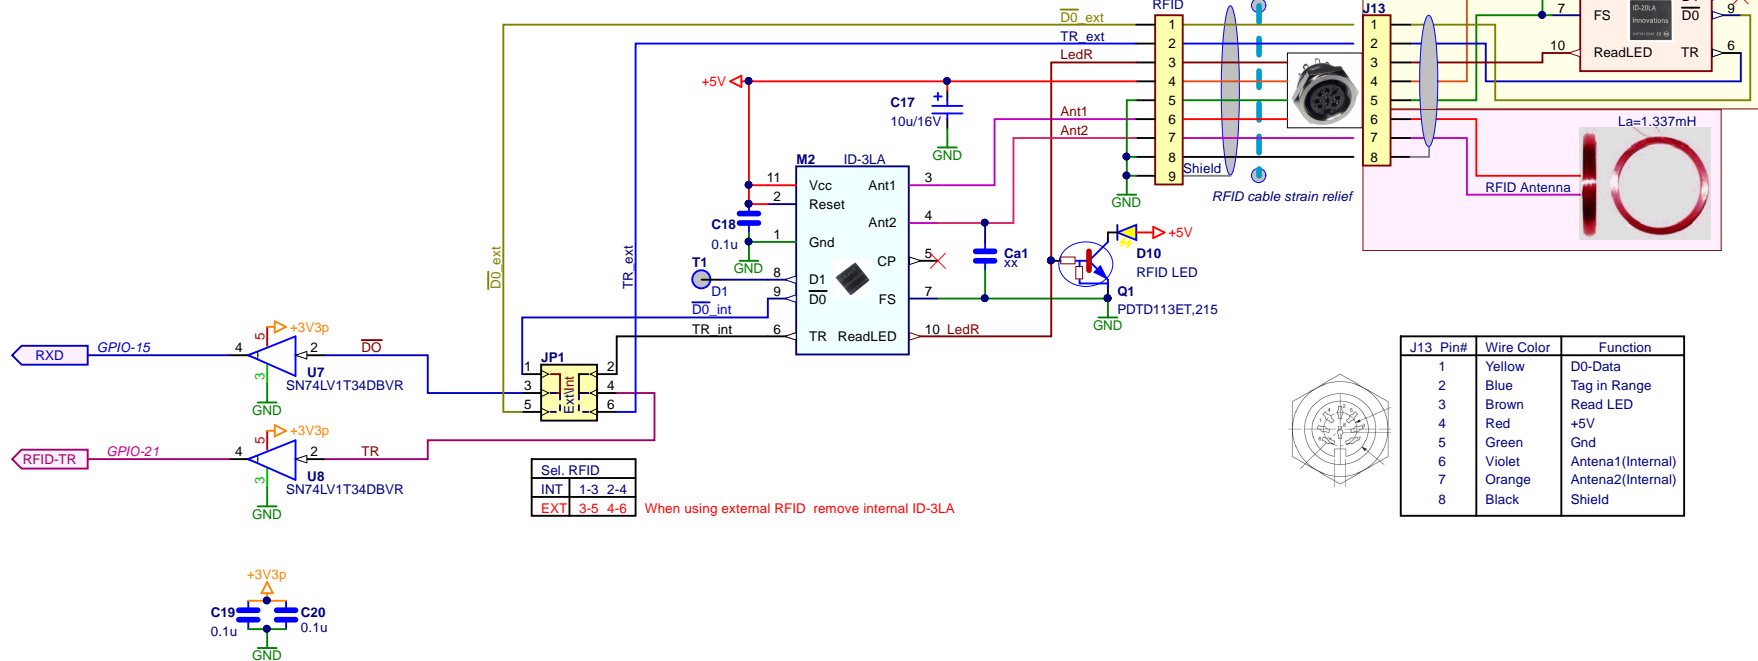

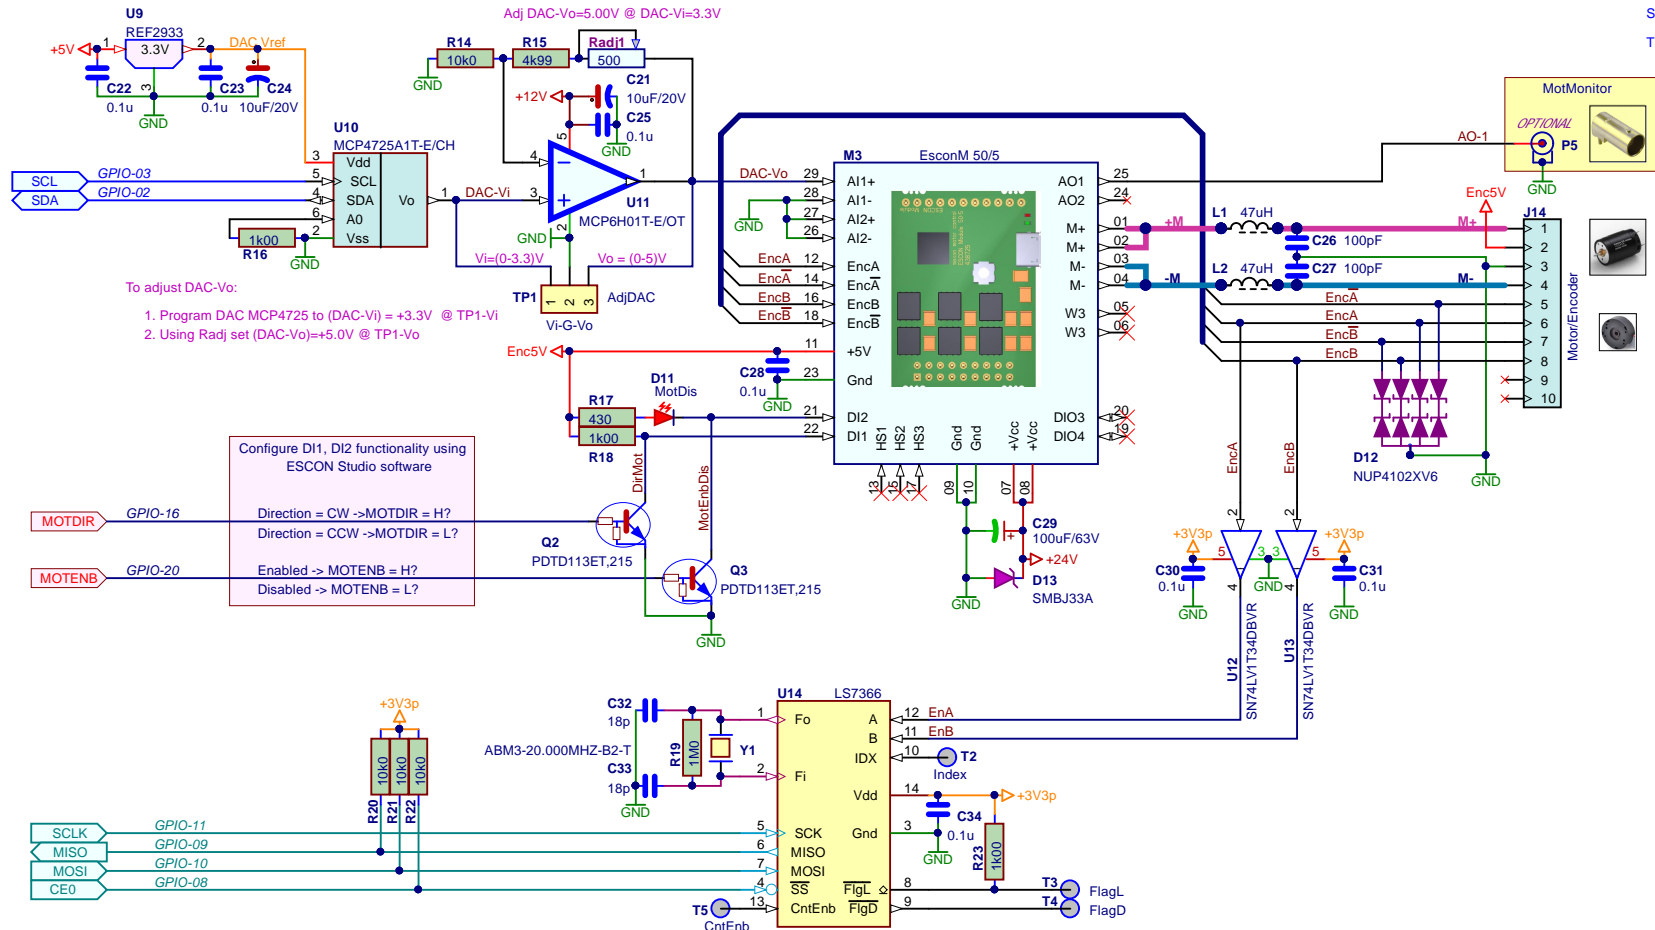

Project: **Lever Pulling Task Device**

Title: **Motor Driver and Encoder**

Date: 9/1/2017

Nr: PiPaw

Rev. PK120617/A

Drawn by:

File: Escon.SchDoc

Sheet: 5 of 7

PawelK

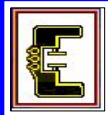

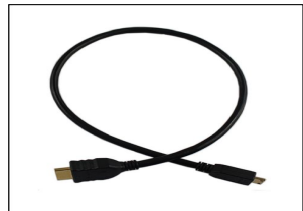

Cable: HDMI-C Male to HDMI-C Male  
CNC Tech P#: 742-20010-00100  
Digi Key: 1175-1678-ND \$15.78

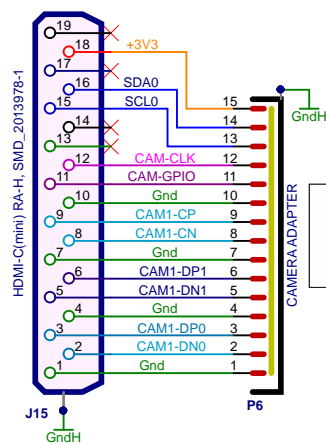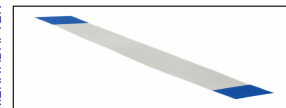

Cable FFC: 15p 1mm

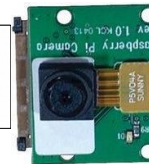

|                                           |           |                 |                                                                                                         |
|-------------------------------------------|-----------|-----------------|---------------------------------------------------------------------------------------------------------|
| Project: <b>Lever Pulling Task Device</b> |           |                 |                                                                                                         |
| Title: <b>HDMI, Camera Adapter</b>        |           |                 |                                                                                                         |
| Date: 8/13/2017                           | Nr: PiPaw | Rev. PK120617/A | Drawn by:                                                                                               |
| File: HDMI_CAM.SchDoc                     |           | Sheet: 6 of 7   | PawelK                                                                                                  |
|                                           |           |                 | <br><b>EnixLAB</b> |



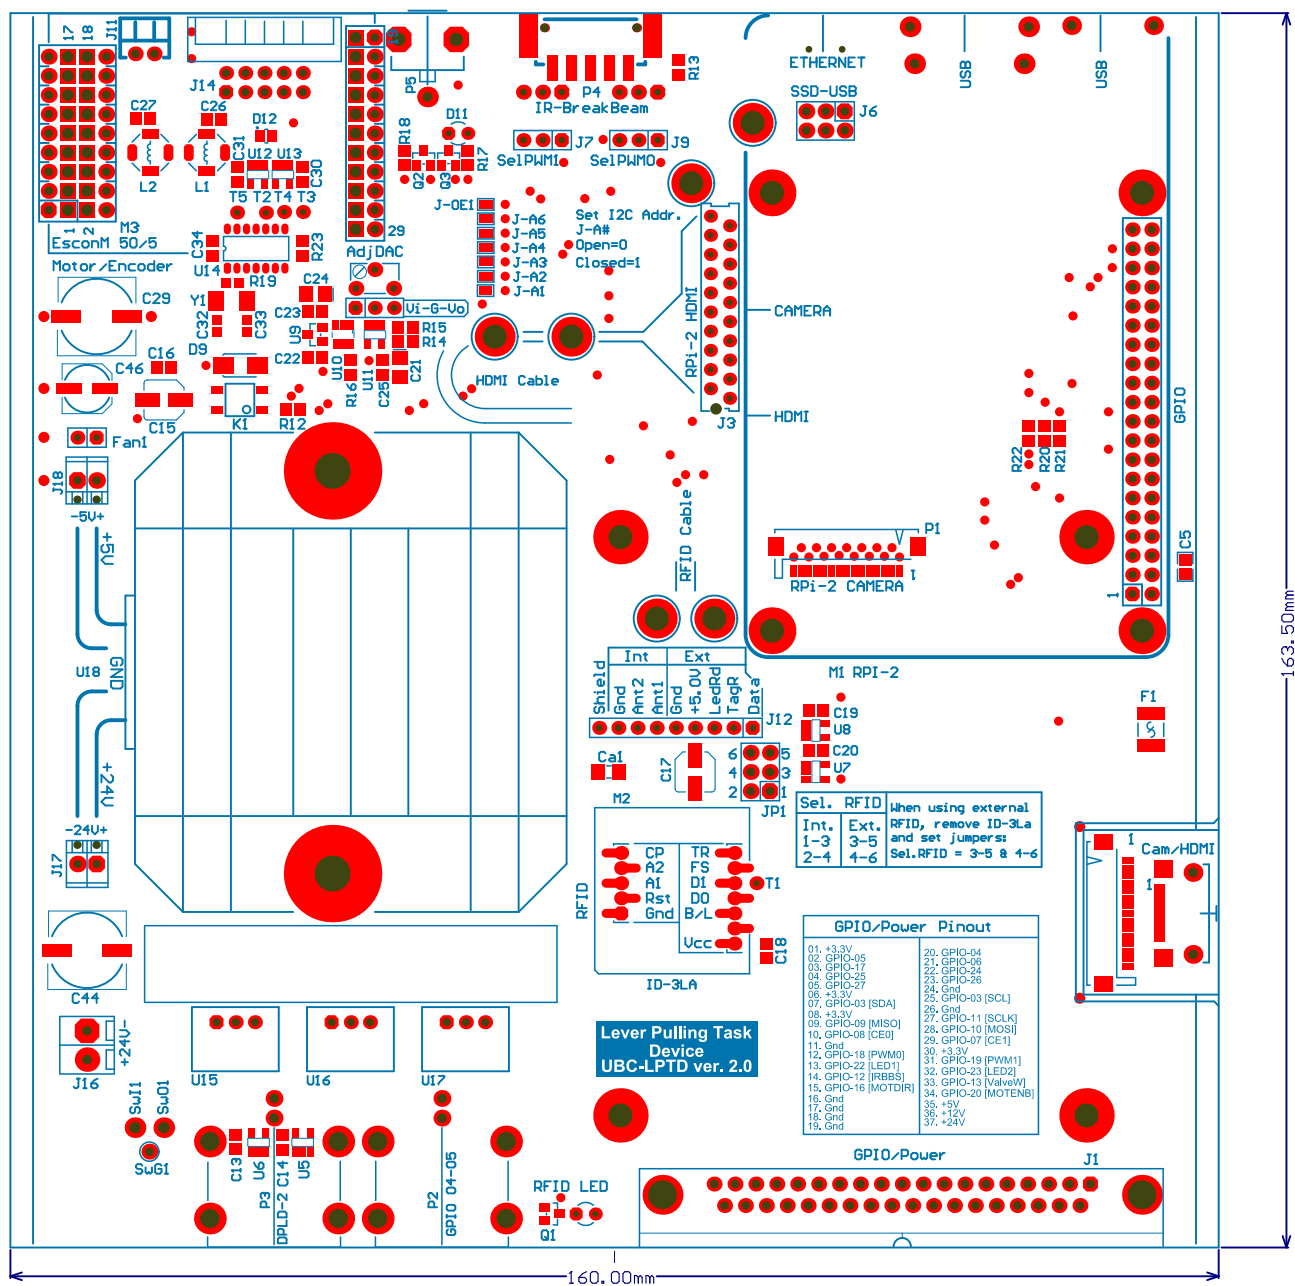



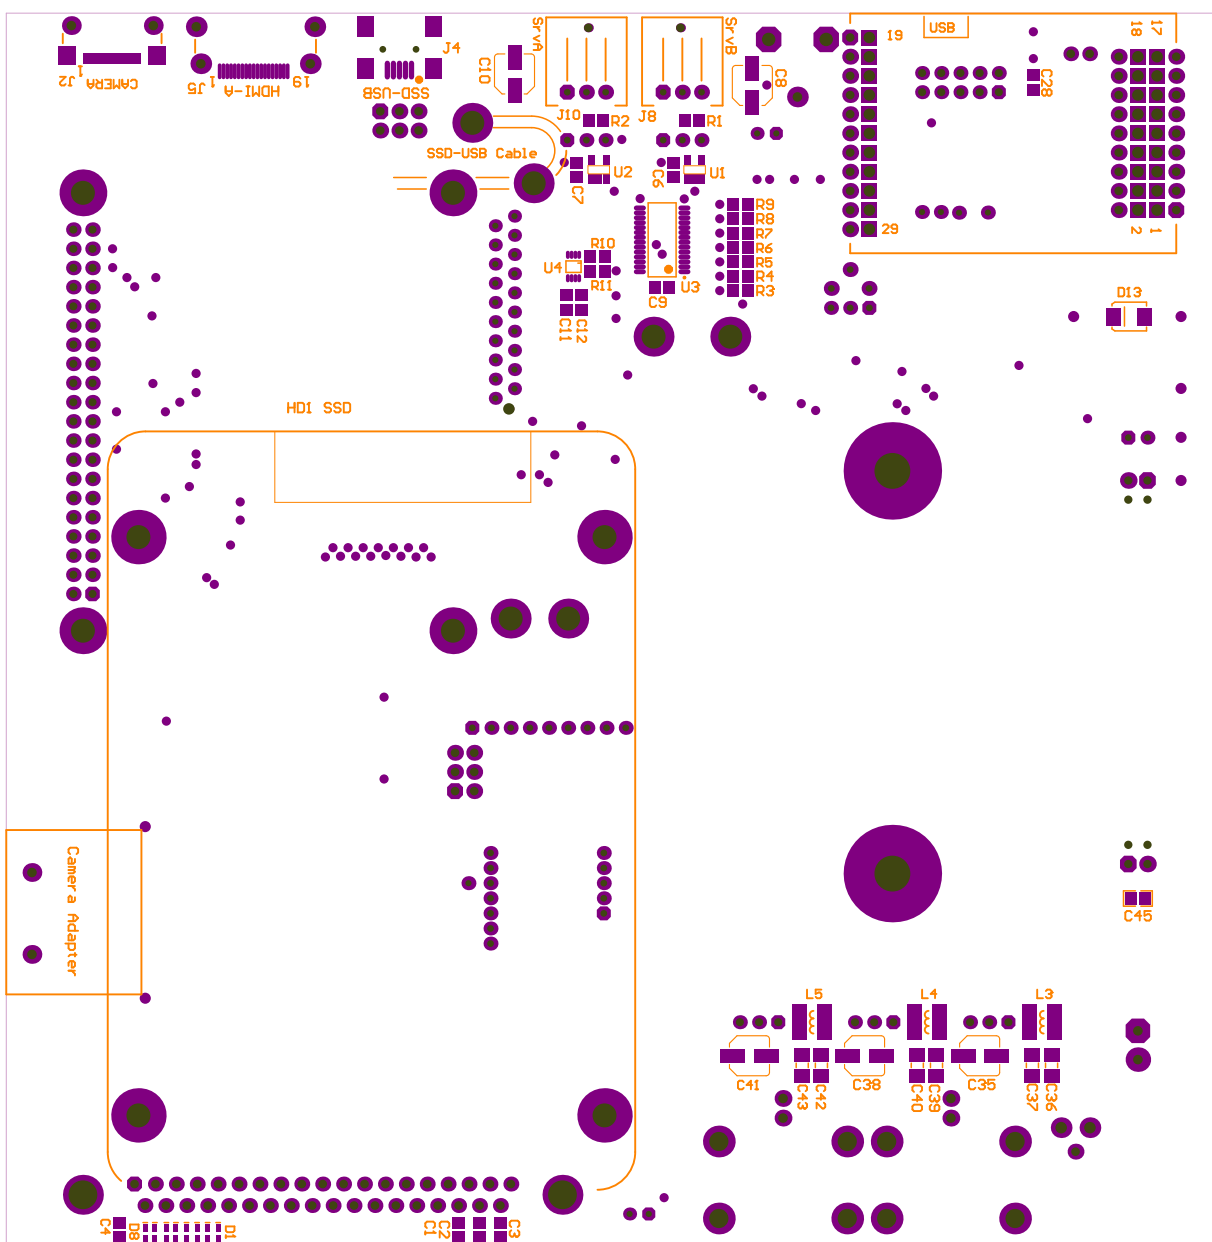

Supplement: supp3 [file AHF_Homecage_control_LPTD_SchPcb v2a.pdf › electronics_box_and_breakout/AHF_Homecage_control_LPTD_SchPcb v2a.pdf]
