# Supplementary material for: Automated task training and longitudinal monitoring of mouse mesoscale cortical circuits using home cages
Source: eLife journal article supplement (doi:10.7554/elife.55964), 2020-05-15
Supplement: supp2 [file elife-55964-supp2-v2.zip]

| ITEM # | QTY | PART NUMBER | ASSY | DESCRIPTION    | MATERIAL |
|--------|-----|-------------|------|----------------|----------|
| 1      | 1   | STOCK       |      | 1/8" Thick Bar | Steel    |

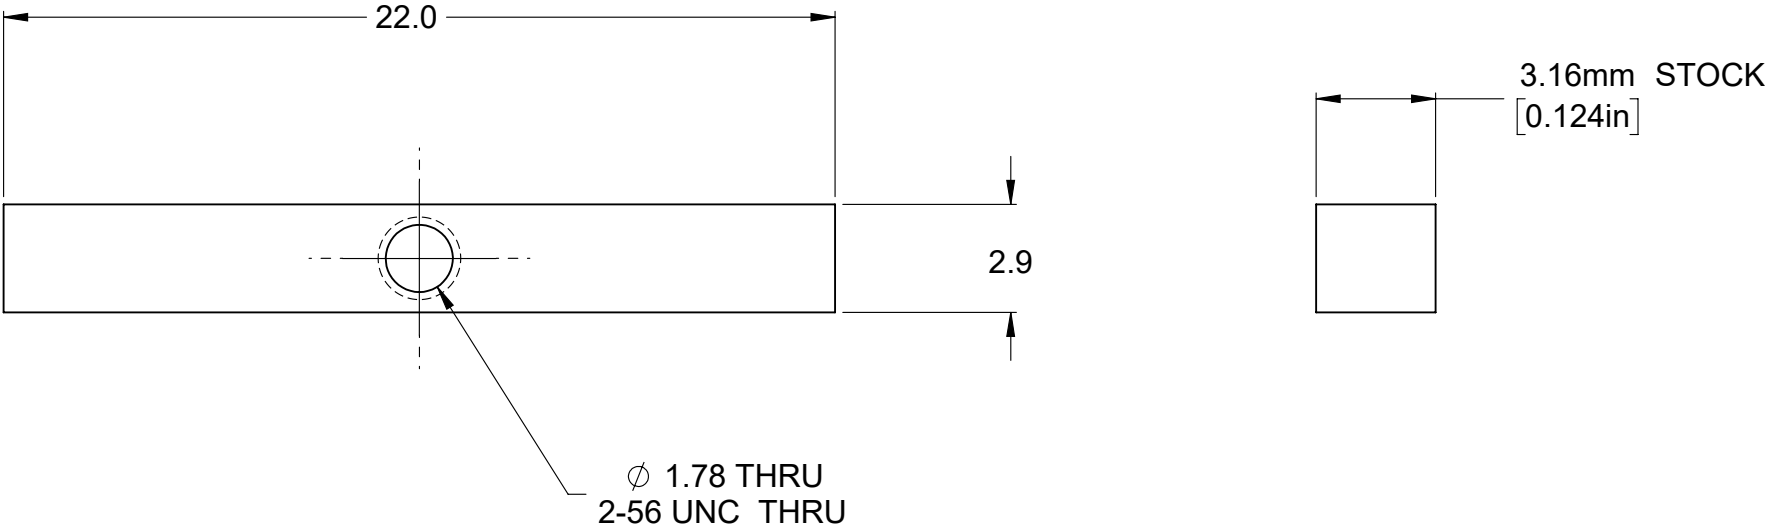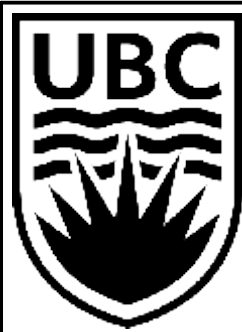

|                                                                                  |             |           |  |            |   |              |   |             |       |                                    |  |                       |  |       |  |
|----------------------------------------------------------------------------------|-------------|-----------|--|------------|---|--------------|---|-------------|-------|------------------------------------|--|-----------------------|--|-------|--|
| DRAWN                                                                            |             | F.L.      |  | DATE       |   | Jan 30, 2017 |   | DFTG APPVL  |       | Drawing Name<br><br>Bar            |  |                       |  |       |  |
|                                                                                  |             |           |  |            |   |              |   |             |       |                                    |  |                       |  |       |  |
| MECH ENGR                                                                        |             | ELEC ENGR |  | CIVIL ENGR |   | PHYSICS      |   | ENGRG APPVL |       |                                    |  |                       |  |       |  |
| REV                                                                              | DESCRIPTION |           |  |            |   | DATE         |   | DRAWN       | APPVL | Project Name<br><br>Bar and Handle |  |                       |  |       |  |
|                                                                                  |             |           |  |            |   |              |   |             |       |                                    |  |                       |  |       |  |
|                                                                                  |             |           |  |            |   |              |   |             |       |                                    |  |                       |  |       |  |
| UNLESS OTHERWISE NOTED, ALL DIMENSIONS ARE IN MILLIMETERS                        |             |           |  |            |   |              |   |             |       | SIZE                               |  | W.O. NO.              |  | ISSUE |  |
| PERMISSABLE DIMENSIONAL DEVIATION:                                               |             |           |  |            |   |              |   |             |       | B                                  |  | M17-012               |  |       |  |
| TOLERANCES:    DECIMALS                      ANGLES                      SURFACE |             |           |  |            |   |              |   |             |       | SCALE<br><br>5:1                   |  | SHEET    1    OF    1 |  |       |  |
| .X    ± 0.1                                                                      |             |           |  |            | ± |              | ✓ |             |       |                                    |  |                       |  |       |  |
| .XX   ± 0.05                                                                     |             |           |  |            |   |              |   |             |       |                                    |  |                       |  |       |  |
| .XXX ±                                                                           |             |           |  |            |   |              |   |             |       |                                    |  |                       |  |       |  |
