# Supplementary material for: Automated task training and longitudinal monitoring of mouse mesoscale cortical circuits using home cages
Source: eLife journal article supplement (doi:10.7554/elife.55964), 2020-05-15
Supplement: supp2 [file elife-55964-supp2-v2.zip]

| ITEM # | QTY | PART NUMBER | ASSY | DESCRIPTION | MATERIAL   |
|--------|-----|-------------|------|-------------|------------|
| 1      | 1   | STOCK       |      |             | 6061 Alloy |

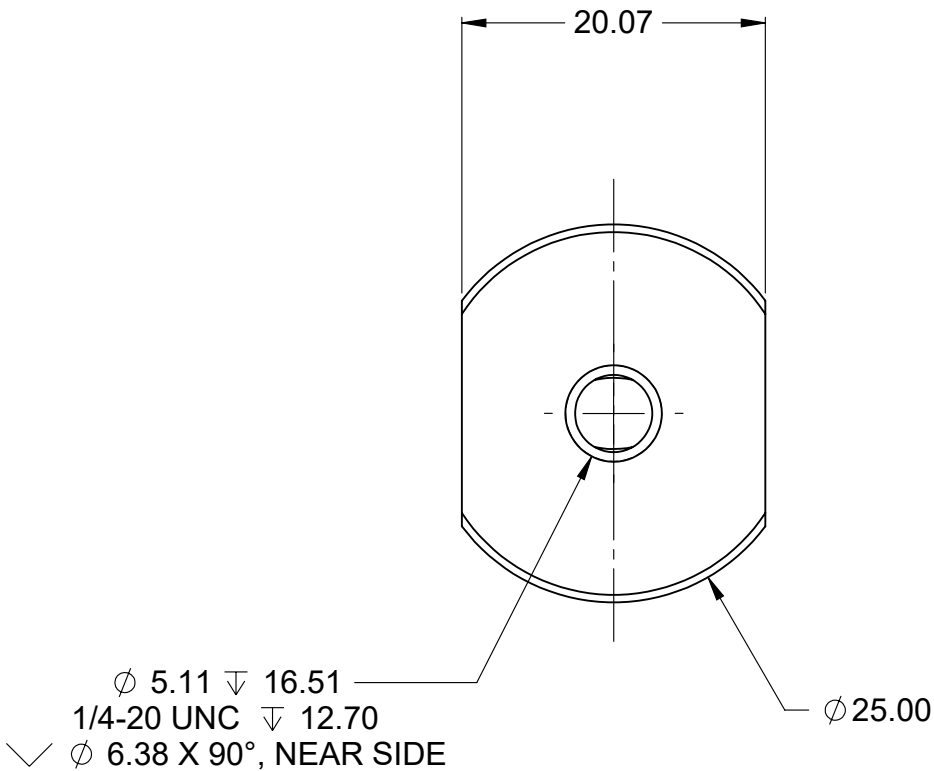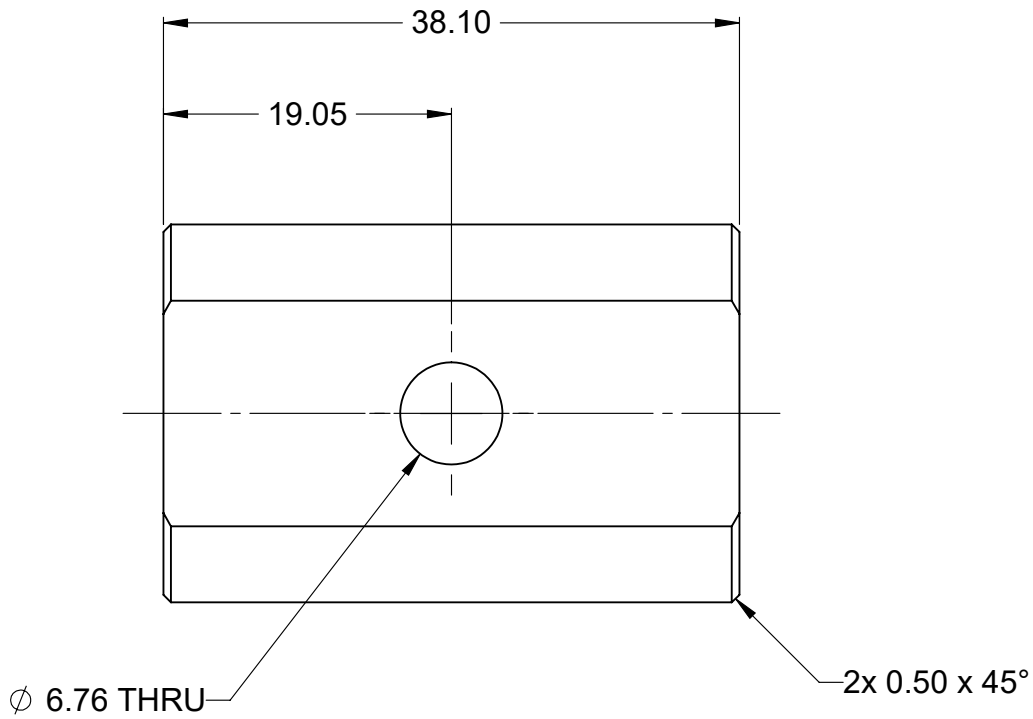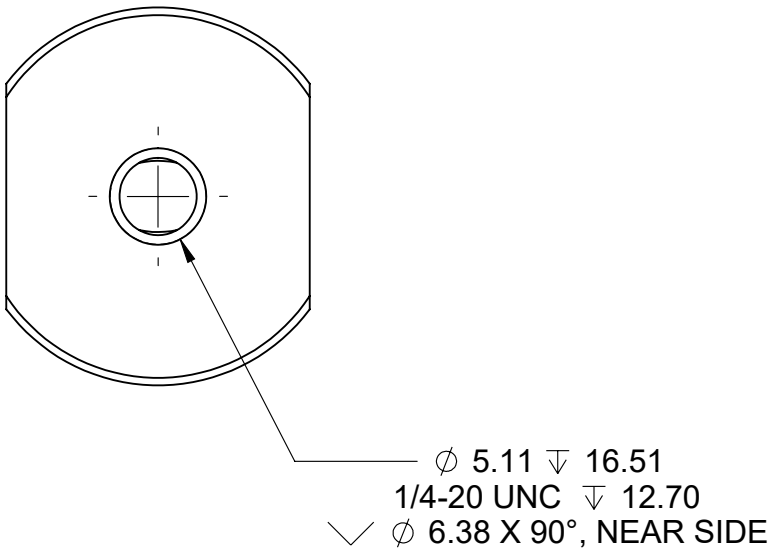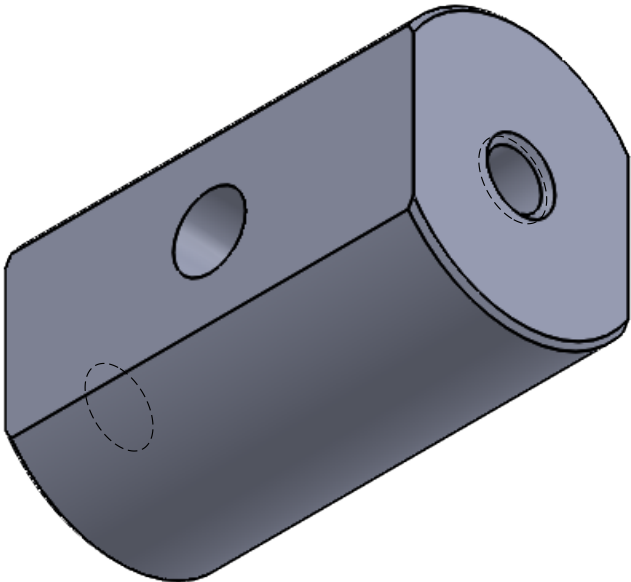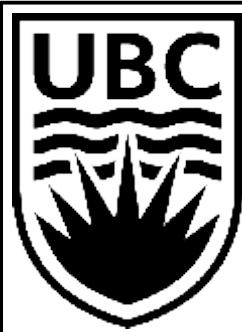

|                                                           |             |           |      |            |      |              |       |             |                                           |                                         |          |  |       |       |    |   |
|-----------------------------------------------------------|-------------|-----------|------|------------|------|--------------|-------|-------------|-------------------------------------------|-----------------------------------------|----------|--|-------|-------|----|---|
| DRAWN                                                     |             | F.L.      |      | DATE       |      | Jan 24, 2017 |       | DFTG APPVL  |                                           | Drawing Name<br><br>Milled_as-1.50_2_v2 |          |  |       |       |    |   |
|                                                           |             |           |      |            |      |              |       |             |                                           |                                         |          |  |       |       |    |   |
| MECH ENGR                                                 |             | ELEC ENGR |      | CIVIL ENGR |      | PHYSICS      |       | ENGRG APPVL |                                           |                                         |          |  |       |       |    |   |
| REV                                                       | DESCRIPTION |           |      |            | DATE |              | DRAWN | APPVL       | Project Name<br><br>Mounts and Spacers II |                                         |          |  |       |       |    |   |
|                                                           |             |           |      |            |      |              |       |             |                                           |                                         |          |  |       |       |    |   |
|                                                           |             |           |      |            |      |              |       |             |                                           |                                         |          |  |       |       |    |   |
|                                                           |             |           |      |            |      |              |       |             |                                           |                                         |          |  |       |       |    |   |
| UNLESS OTHERWISE NOTED, ALL DIMENSIONS ARE IN MILLIMETERS |             |           |      |            |      |              |       |             |                                           | SIZE                                    | W.O. NO. |  |       | ISSUE |    |   |
| PERMISSABLE DIMENSIONAL DEVIATION:                        |             |           |      |            |      |              |       |             |                                           | B                                       | M17-010  |  |       |       |    |   |
| TOLERANCES: DECIMALS                                      |             |           |      |            |      |              |       |             |                                           |                                         |          |  |       |       |    |   |
| ANGLES                                                    |             |           |      |            |      |              |       |             |                                           |                                         |          |  |       |       |    |   |
| SURFACE                                                   |             |           |      |            |      |              |       |             |                                           |                                         |          |  |       |       |    |   |
|                                                           | .X          | ±         | 0.1  |            |      |              |       |             |                                           | SCALE                                   | 2:1      |  | SHEET | 1     | OF | 1 |
|                                                           | .XX         | ±         | 0.05 |            | ±    |              |       |             |                                           |                                         |          |  |       |       |    |   |
|                                                           | .XXX        | ±         |      |            |      |              |       |             |                                           |                                         |          |  |       |       |    |   |
|                                                           |             |           |      |            |      |              |       |             |                                           |                                         |          |  |       |       |    |   |
