# Supplementary material for: Automated task training and longitudinal monitoring of mouse mesoscale cortical circuits using home cages
Source: eLife journal article supplement (doi:10.7554/elife.55964), 2020-05-15
Supplement: supp2 [file elife-55964-supp2-v2.zip]

| ITEM # | QTY | PART NUMBER | ASSY | DESCRIPTION | MATERIAL |
|--------|-----|-------------|------|-------------|----------|
| 1      | 1   | STOCK       |      |             | Aluminum |

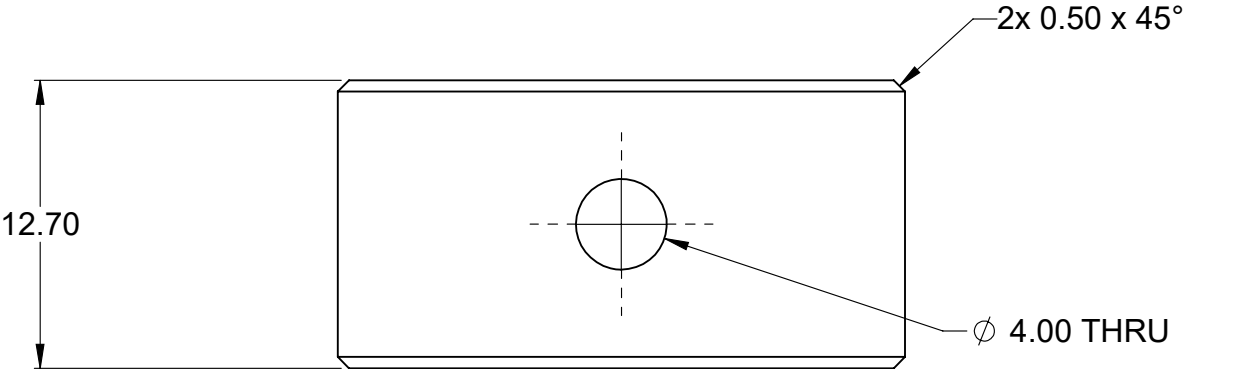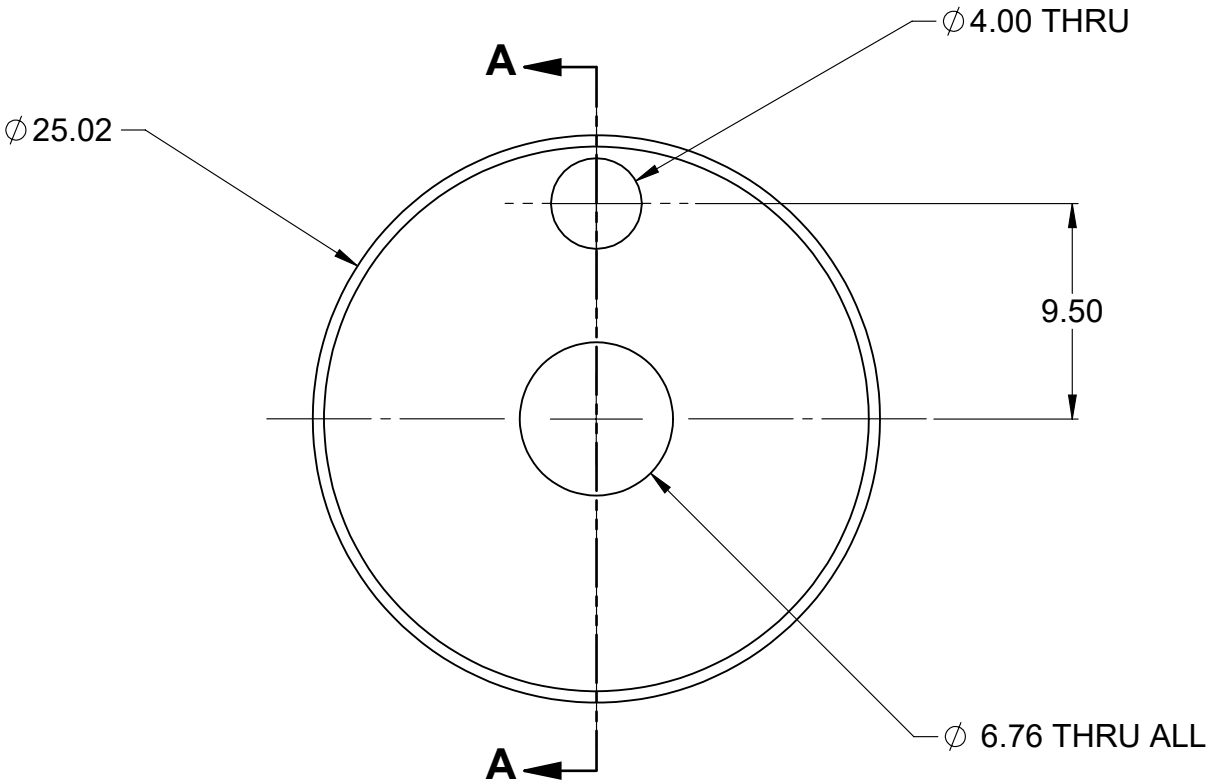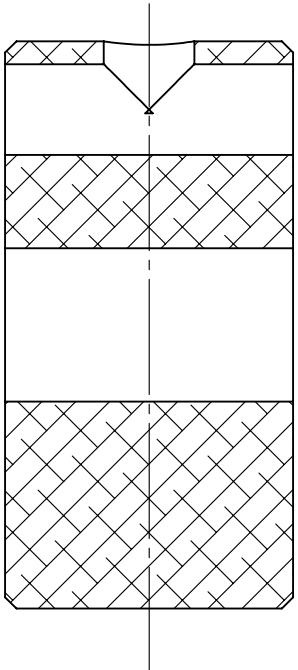

SECTION A-A

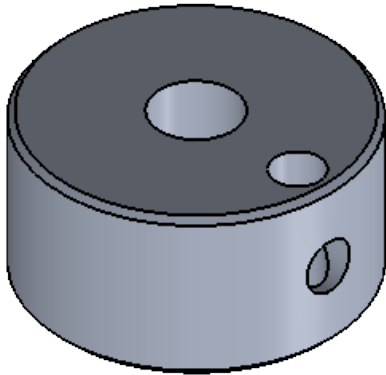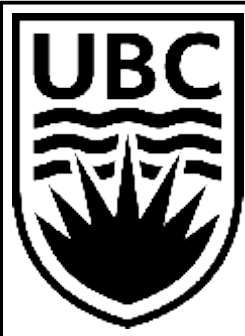

|                                                           |             |           |  |            |      |              |       |             |  |                                                 |  |          |  |        |  |
|-----------------------------------------------------------|-------------|-----------|--|------------|------|--------------|-------|-------------|--|-------------------------------------------------|--|----------|--|--------|--|
| DRAWN                                                     |             | F.L.      |  | DATE       |      | Jan 24, 2017 |       | DFTG APPVL  |  | Drawing Name<br><br>Spacer_with_hole_as-.500_v2 |  |          |  |        |  |
|                                                           |             |           |  |            |      |              |       |             |  |                                                 |  |          |  |        |  |
| MECH ENGR                                                 |             | ELEC ENGR |  | CIVIL ENGR |      | PHYSICS      |       | ENGRG APPVL |  |                                                 |  |          |  |        |  |
| REV                                                       | DESCRIPTION |           |  |            | DATE |              | DRAWN | APPVL       |  | Project Name<br><br>Mounts and Spacers II       |  |          |  |        |  |
|                                                           |             |           |  |            |      |              |       |             |  |                                                 |  |          |  |        |  |
|                                                           |             |           |  |            |      |              |       |             |  |                                                 |  |          |  |        |  |
| UNLESS OTHERWISE NOTED, ALL DIMENSIONS ARE IN MILLIMETERS |             |           |  |            |      |              |       |             |  | SIZE                                            |  | W.O. NO. |  | ISSUE  |  |
| PERMISSABLE DIMENSIONAL DEVIATION:                        |             |           |  |            |      |              |       |             |  | B                                               |  | M17-010  |  |        |  |
| TOLERANCES: DECIMALS                                      |             |           |  |            |      |              |       |             |  | ANGLES                                          |  | SURFACE  |  |        |  |
| .X ± 0.1                                                  |             |           |  | ±          |      |              |       |             |  | SCALE                                           |  | SHEET    |  | 1 OF 1 |  |
| .XX ± 0.05                                                |             |           |  |            |      |              |       |             |  | 3:1                                             |  |          |  |        |  |
| .XXX ±                                                    |             |           |  |            |      |              |       |             |  |                                                 |  |          |  |        |  |
