# Supplementary material for: Automated task training and longitudinal monitoring of mouse mesoscale cortical circuits using home cages
Source: eLife journal article supplement (doi:10.7554/elife.55964), 2020-05-15
Supplement: supp2 [file elife-55964-supp2-v2.zip]

| ITEM # | QTY | PART NUMBER | ASSY | DESCRIPTION | MATERIAL |
|--------|-----|-------------|------|-------------|----------|
| 1      | 1   | STOCK       |      |             | Steel    |

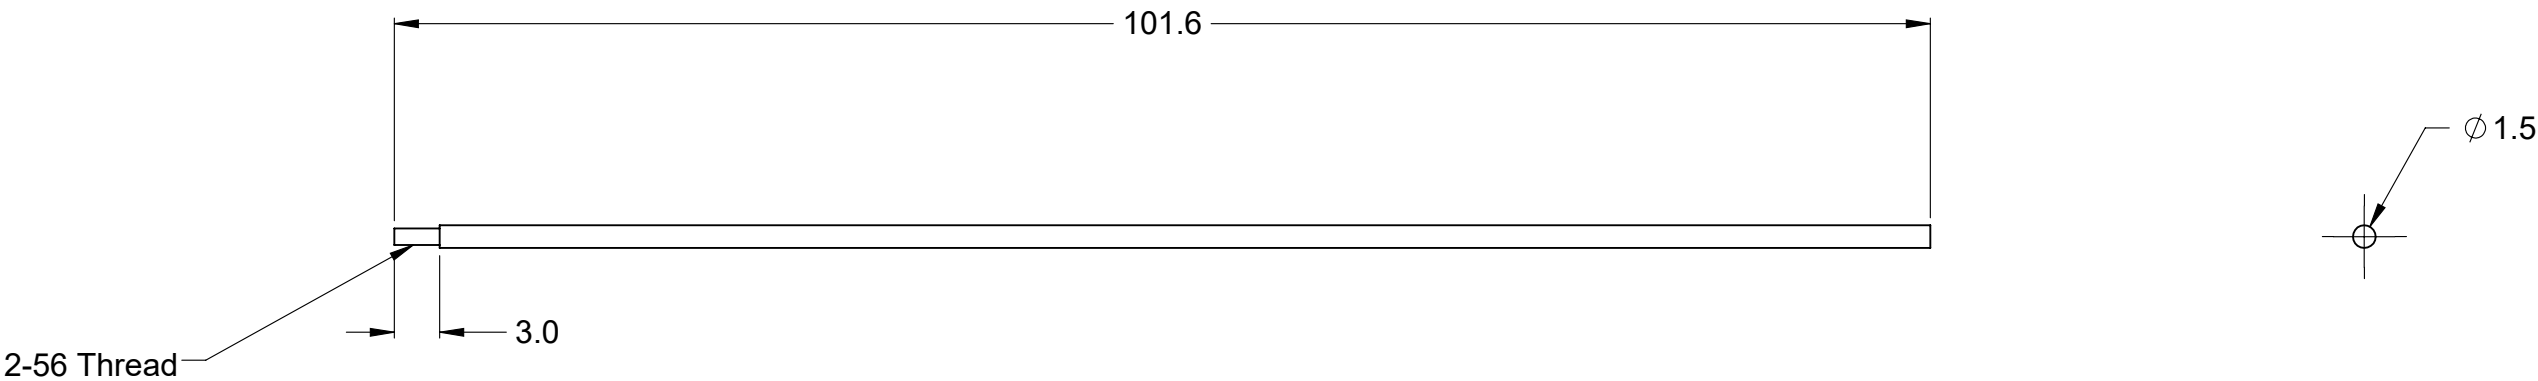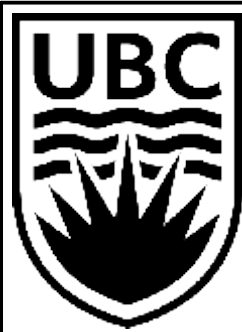

|                             |             |                       |  |                                                                           |  |                            |       |                                    |                  |              |       |
|-----------------------------|-------------|-----------------------|--|---------------------------------------------------------------------------|--|----------------------------|-------|------------------------------------|------------------|--------------|-------|
| DRAWN F.L.                  |             | DATE Jan 30, 2017     |  | DFTG APPVL                                                                |  | Drawing Name<br><br>Handle |       |                                    |                  |              |       |
|                             |             |                       |  |                                                                           |  |                            |       |                                    |                  |              |       |
| MECH ENGR                   |             | ELEC ENGR             |  | CIVIL ENGR                                                                |  |                            |       | PHYSICS                            |                  | ENGRG APPVL  |       |
| REV                         | DESCRIPTION |                       |  | DATE                                                                      |  | DRAWN                      | APPVL | Project Name<br><br>Bar and Handle |                  |              |       |
|                             |             |                       |  |                                                                           |  |                            |       |                                    |                  |              |       |
|                             |             |                       |  |                                                                           |  |                            |       |                                    |                  |              |       |
| FINISH                      |             | THIRD ANGLE PROJ.<br> |  | UNLESS OTHERWISE NOTED, ALL DIMENSIONS ARE IN MILLIMETERS                 |  |                            |       | SIZE B                             | W.O. NO. M17-012 |              | ISSUE |
| METRIC DRAWING<br>UNITS: mm |             |                       |  | PERMISSABLE DIMENSIONAL DEVIATION:<br>TOLERANCES: DECIMALS ANGLES SURFACE |  |                            |       | SCALE 2:1                          |                  | SHEET 1 OF 1 |       |
|                             |             |                       |  | .X ± 0.1<br>.XX ± 0.05<br>.XXX ±                                          |  |                            |       | ±                                  |                  | ✓            |       |
