# Supplementary material for: Automated task training and longitudinal monitoring of mouse mesoscale cortical circuits using home cages
Source: eLife journal article supplement (doi:10.7554/elife.55964), 2020-05-15
Supplement: supp3 [file Breakout_LPDT_Ext.pdf › electronics_box_and_breakout/Breakout_LPDT_Ext.pdf]

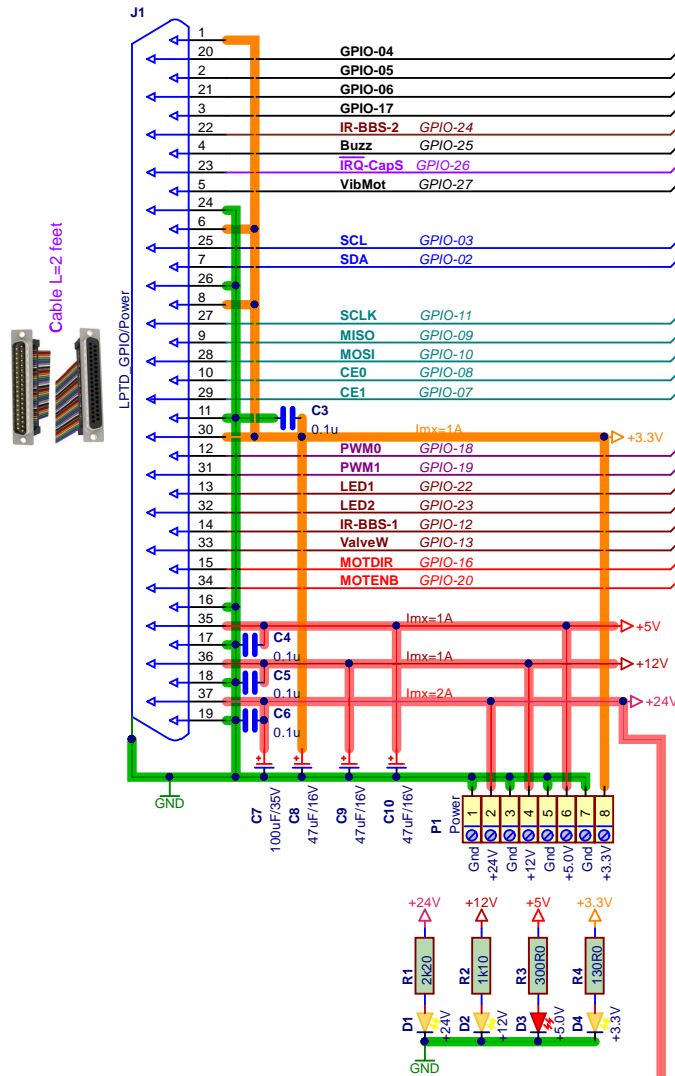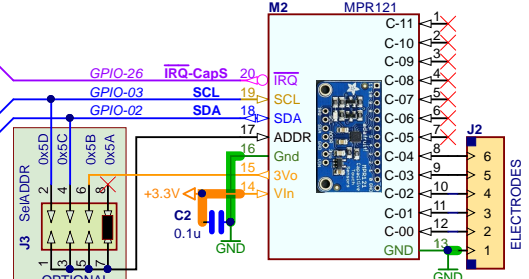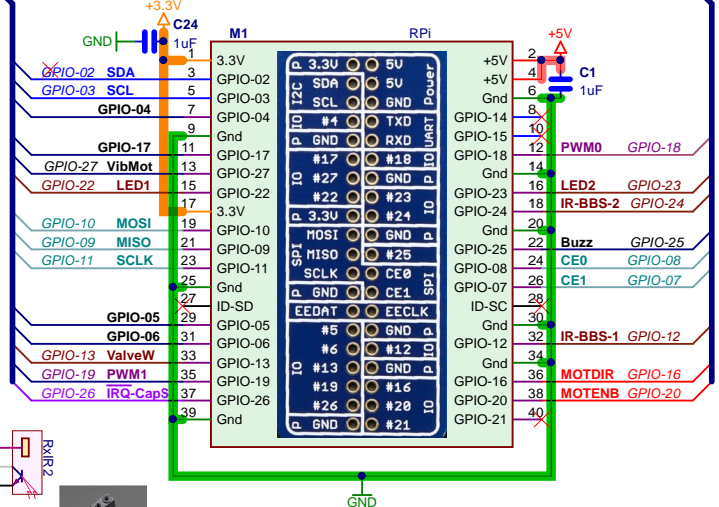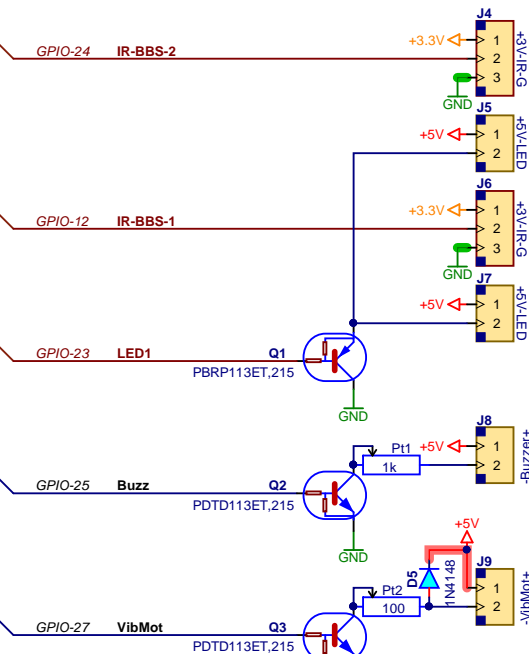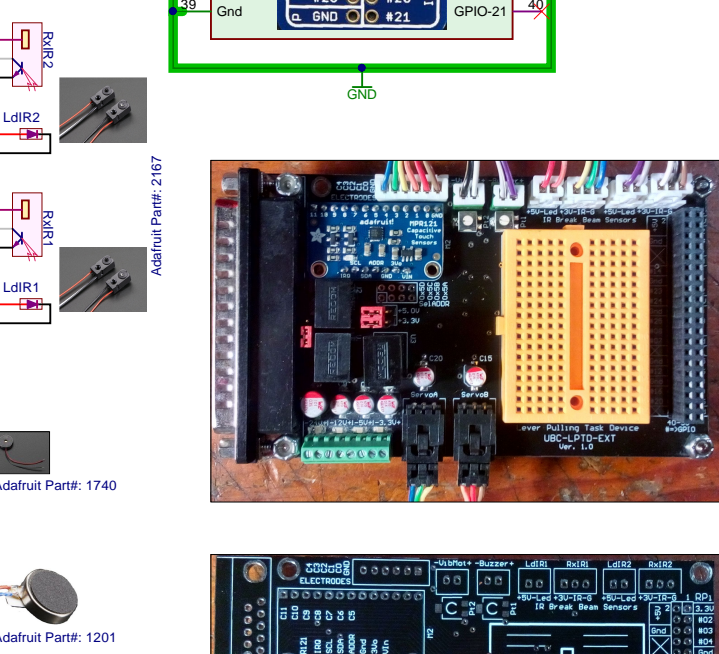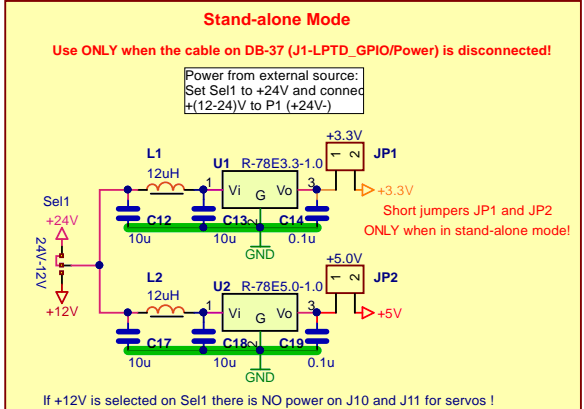

Project: **LPTD Extension**

Title: **Lever Pulling Task Device Extension**

Date: 7/11/2018 Nr: LPTD\_Ext Rev: PK230618/A Drawn by: PawelK

File: LPTD\_Ext.SchDoc Sheet: 1 of 1

**EnixLAB**
