# Supplementary figures and images for: Automated task training and longitudinal monitoring of mouse mesoscale cortical circuits using home cages
Source: eLife journal article supplement (doi:10.7554/elife.55964), 2020-05-15

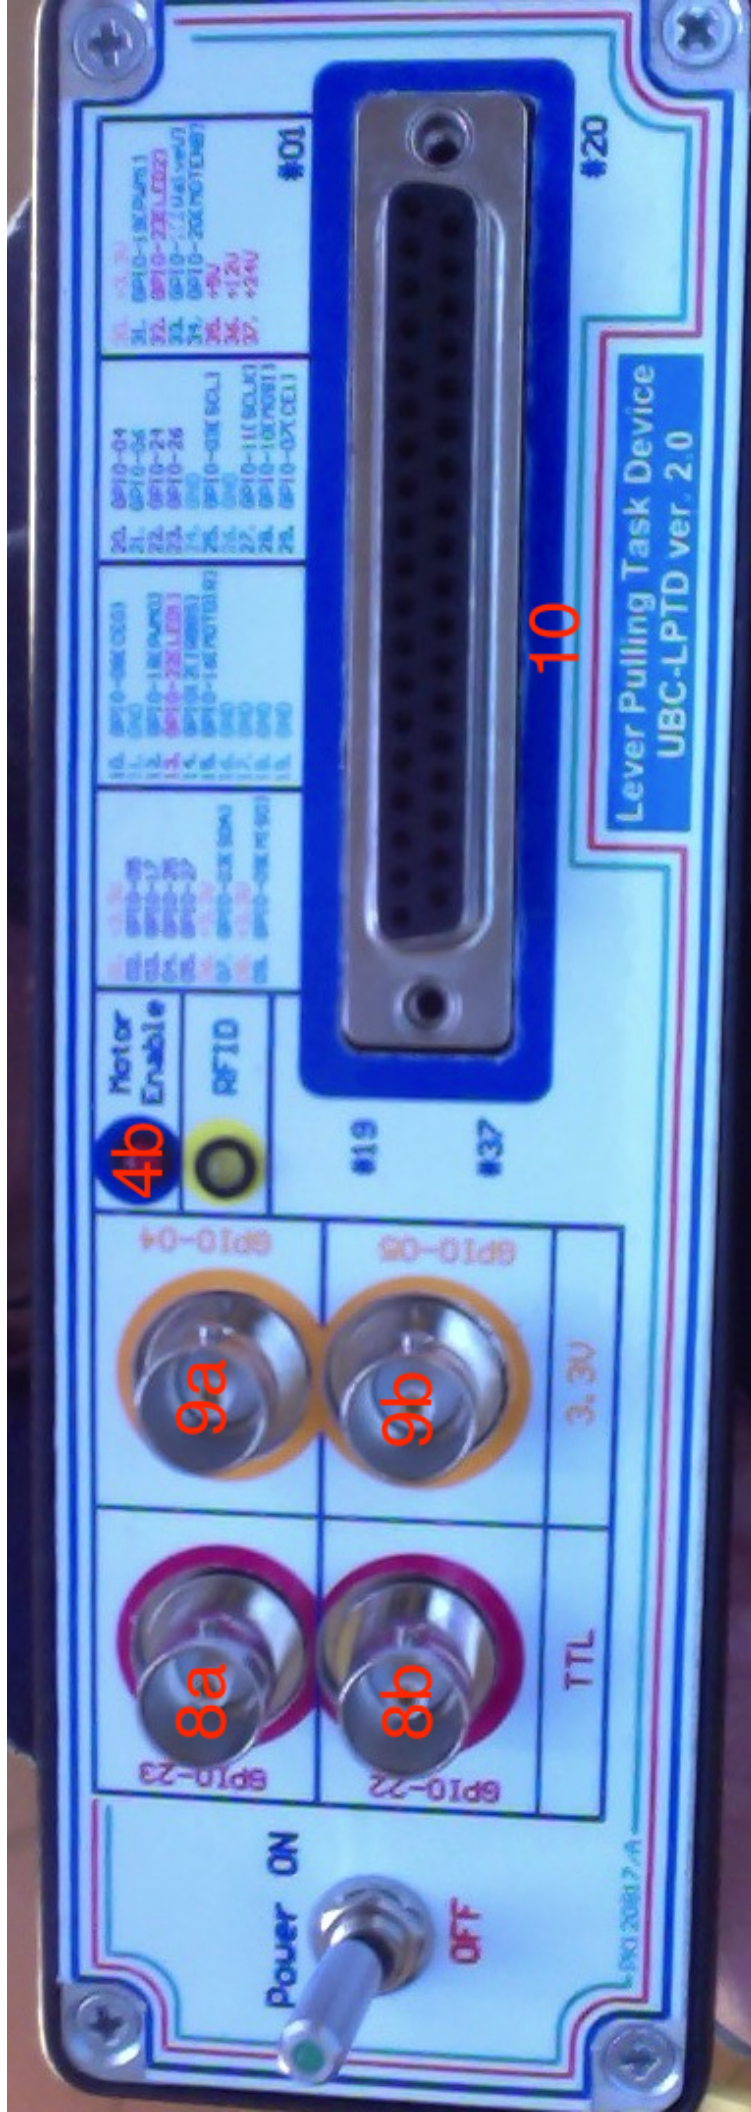

Supplement: supp3 [file AHFboxFront.pdf › electronics_box_and_breakout/AHFboxFront.pdf]

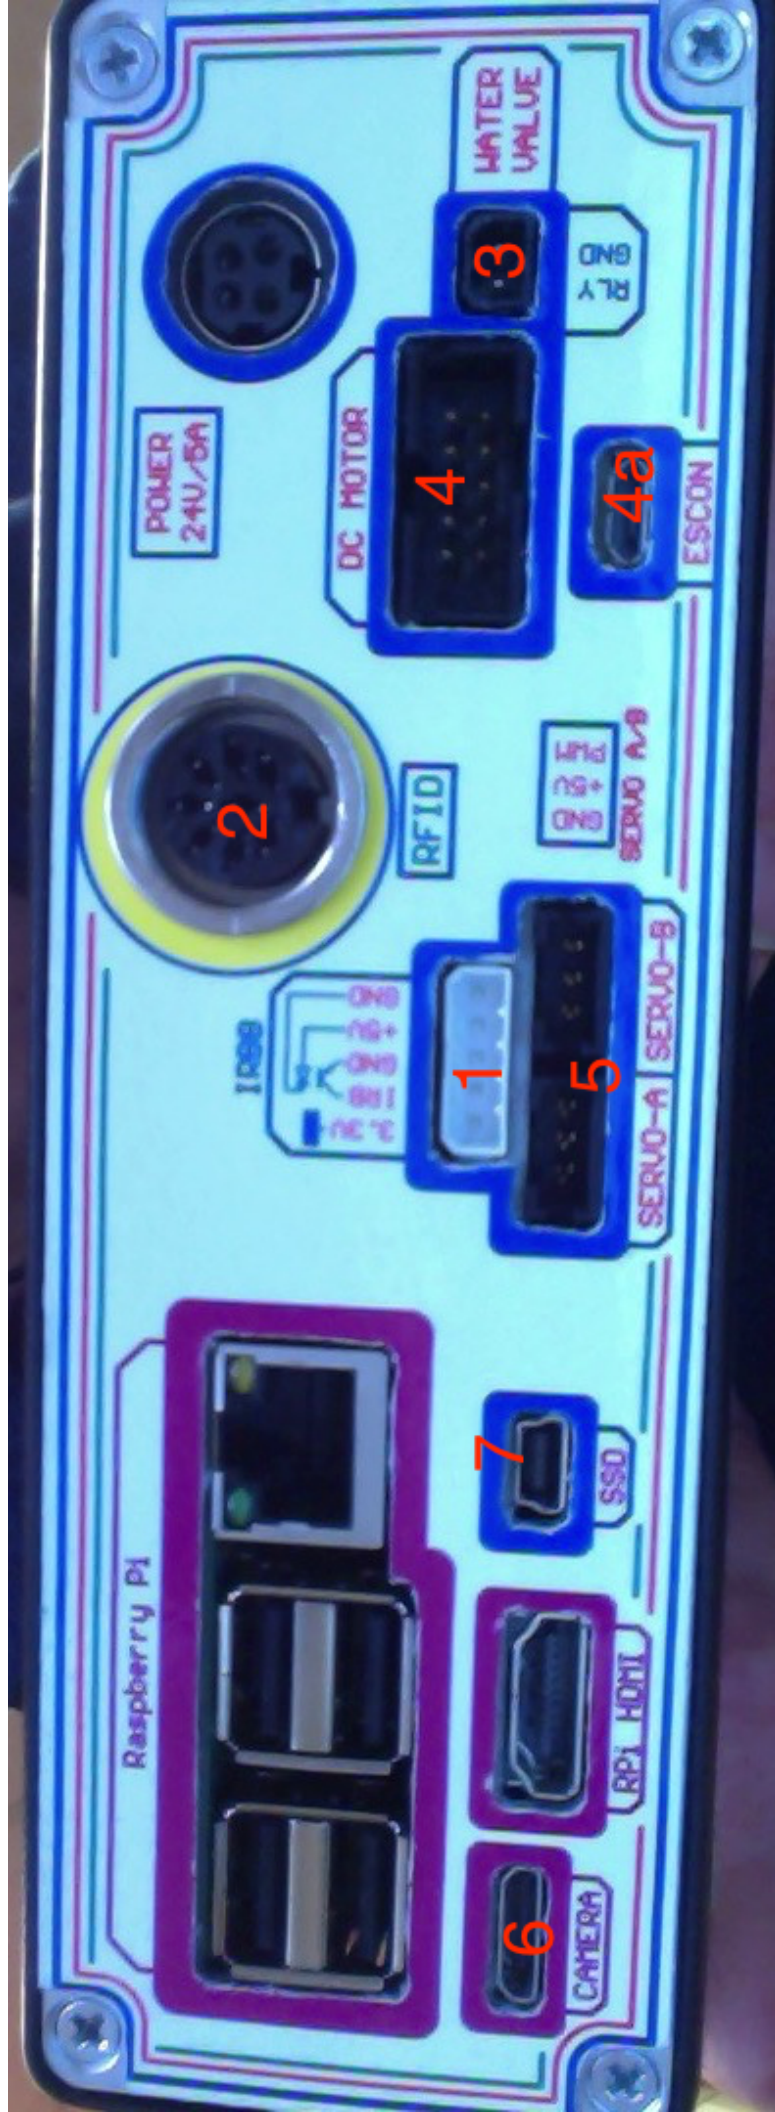

Supplement: supp3 [file AHFboxRear.pdf › electronics_box_and_breakout/AHFboxRear.pdf]
